# Supplementary material
Source: PubMed Central journal article supplement (PMC3980634)
Supplement: NIHMS57777-supplement-Table_4A.pdf [file NIHMS57777-supplement-Table_4A.pdf]

| <b>Figure 4A</b>                                                                   |                            |                             |                          |
|------------------------------------------------------------------------------------|----------------------------|-----------------------------|--------------------------|
| <b>Database:</b> <a href="http://pubmlst.org/rmlst/">http://pubmlst.org/rmlst/</a> |                            |                             |                          |
| <b>Project name:</b> Maiden 2013 Nat Rev rMLST                                     |                            |                             |                          |
| <b>Project id:</b> 31                                                              |                            |                             |                          |
| <b>Description:</b> Staphylococcal rMLST analysis                                  |                            |                             |                          |
| <b>BIGSdb ID</b>                                                                   | <b>BIGSdb isolate name</b> | <b>ENA accession number</b> | <b>References</b>        |
| 55                                                                                 | RF122                      | AJ938182                    | <a href="#">17971880</a> |
| 56                                                                                 | NCTC 8325                  | CP000253                    |                          |
| 58                                                                                 | COL                        | CP000046                    | <a href="#">15774886</a> |
| 59                                                                                 | Mu50                       | BA000017                    | <a href="#">11418146</a> |
|                                                                                    |                            |                             | <a href="#">15141945</a> |
| 67                                                                                 | MRSA252                    | BX571856                    | <a href="#">15213324</a> |
| 69                                                                                 | MW2                        | BA000033                    | <a href="#">12044378</a> |
| 166                                                                                | JCSC1435                   | AP006716                    |                          |
| 486                                                                                | ATCC 12228                 | AE015929                    | <a href="#">12950922</a> |
| 1064                                                                               | TM300                      | AM295250                    | <a href="#">19060169</a> |
| 1236                                                                               | MN8                        | CM000952                    |                          |
| 1241                                                                               | SK14                       | PRJNA31013                  |                          |
| 1242                                                                               | BCM-HMP0060                | PRJNA31545                  |                          |
| 1244                                                                               | W23144                     | PRJNA34655                  |                          |
| 1245                                                                               | SK119                      | PRJNA34087                  |                          |
| 1246                                                                               | L37603                     | PRJNA34083                  |                          |
| 1645                                                                               | RP62A                      | CP000029                    | <a href="#">15774886</a> |
| 1646                                                                               | ATCC 15305                 | AP008934                    | <a href="#">16135568</a> |
| 1999                                                                               | 04-02981                   | PRJNA34809                  | <a href="#">20386717</a> |
| 2030                                                                               | ED133                      | PRJNA41277                  | <a href="#">20624747</a> |
| 2032                                                                               | JKD6159                    | PRJNA50759                  | <a href="#">20729356</a> |
| 2033                                                                               | ST398                      | PRJEA29427                  | <a href="#">20546576</a> |
| 2099                                                                               | TW20                       | PRJEA36647                  | <a href="#">17243050</a> |
|                                                                                    |                            |                             | <a href="#">19948800</a> |
| 2290                                                                               | HO 5096 0412               | PRJEA71279                  |                          |
| 2294                                                                               | 11819-97                   | PRJNA78269                  | <a href="#">22374956</a> |
| 2295                                                                               | M013                       | PRJNA78007                  | <a href="#">22328755</a> |
| 2298                                                                               | LGA251                     | PRJEA62883                  | <a href="#">21641281</a> |
| 2299                                                                               | MSHR1132                   | PRJEA62885                  | <a href="#">21813488</a> |
| 4078                                                                               | N920143                    | FR870271.1                  | <a href="#">21682763</a> |
| 4079                                                                               | HKU09-01                   | CP001837.1                  | <a href="#">20047907</a> |
| 4080                                                                               | HKU10-03                   | CP002439.1                  | <a href="#">21278300</a> |
| 4081                                                                               | ED99                       | CP002478.1                  | <a href="#">21398539</a> |
| 4085                                                                               | VCU116                     | AFTX01000038.1              |                          |
| 4086                                                                               | C87                        | ACRH00000000.1              |                          |
| 4087                                                                               | 8086                       | CAIA00000000                |                          |
| 4088                                                                               | Mu2                        | CAJL00000000                | <a href="#">22933766</a> |
| 4190                                                                               | R1P1                       | AJVA00000000                |                          |
| 4191                                                                               | C80                        | ACRM00000000                |                          |
| 4192                                                                               | VCU122                     | AHLD00000000                |                          |
| 4193                                                                               | ZBW5                       | AKGC00000000                | <a href="#">22887665</a> |
| 4194                                                                               | NCTC 11048                 | CAIB00000000                |                          |
| 4195                                                                               | F1142                      | AJXO00000000                | <a href="#">23045498</a> |

|      |                |                |                          |
|------|----------------|----------------|--------------------------|
| 4196 | CCUG 55927     | AKGE00000000.1 | <a href="#">23209235</a> |
| 4197 | S46            | AMSQ00000000   |                          |
| 4198 | VCU012         | AGUA00000000   |                          |
| 4199 | KACC 16562     | AHKB00000000   | <a href="#">22843581</a> |
| 4200 | CCM 7213       | AEUN00000000   | <a href="#">16166694</a> |
| 4201 | ACS-120-V-Sch1 | AGZX00000000   |                          |
| 4203 | F1028          | AJTR00000000   | <a href="#">23045483</a> |
| 4204 | VCU121         | AFEC00000000   |                          |
| 4205 | OJ82           | ALPU00000000   | <a href="#">23105083</a> |
| 4206 | AL1            | ALOZ00000000   | <a href="#">23144375</a> |
