# Supplementary material
Source: PubMed Central journal article supplement (PMC3980634)
Supplement: NIHMS57777-supplement-Table_4B.pdf [file NIHMS57777-supplement-Table_4B.pdf]

| <b>Figure 4B</b>                                                                                                                      |                            |                             |                          |
|---------------------------------------------------------------------------------------------------------------------------------------|----------------------------|-----------------------------|--------------------------|
| <b>Database:</b> <a href="http://pubmlst.org/rmlst/">http://pubmlst.org/rmlst/</a>                                                    |                            |                             |                          |
| <b>Project name:</b> Maiden 2013 Nat Rev S aureus (238)                                                                               |                            |                             |                          |
| <b>Project id:</b> 11                                                                                                                 |                            |                             |                          |
| <b>Description:</b> 238 isolates with unique rSTs derived from 699 <i>S. aureus</i> isolates included in species level rMLST analysis |                            |                             |                          |
| <b>BIGSdb ID</b>                                                                                                                      | <b>BIGSdb isolate name</b> | <b>ENA accession number</b> | <b>References</b>        |
| 55                                                                                                                                    | RF122                      | AJ938182                    | <a href="#">17971880</a> |
| 56                                                                                                                                    | NCTC 8325                  | CP000253                    |                          |
| 58                                                                                                                                    | COL                        | CP000046                    | <a href="#">15774886</a> |
| 59                                                                                                                                    | Mu50                       | BA000017                    | <a href="#">11418146</a> |
|                                                                                                                                       |                            |                             | <a href="#">15141945</a> |
| 60                                                                                                                                    | N315                       | BA000018                    | <a href="#">11418146</a> |
| 61                                                                                                                                    | USA300_TCH1516             | CP000730                    | <a href="#">17986343</a> |
| 62                                                                                                                                    | JH1                        | CP000736                    | <a href="#">17517606</a> |
| 63                                                                                                                                    | JH9                        | CP000703                    | <a href="#">17517606</a> |
| 64                                                                                                                                    | USA300_FPR3757             | CP000255                    | <a href="#">16517273</a> |
| 66                                                                                                                                    | Newman                     | AP009351                    | <a href="#">17951380</a> |
| 67                                                                                                                                    | MRSA252                    | BX571856                    | <a href="#">15213324</a> |
| 68                                                                                                                                    | MSSA476                    | BX571857                    | <a href="#">15213324</a> |
| 69                                                                                                                                    | MW2                        | BA000033                    | <a href="#">12044378</a> |
| 165                                                                                                                                   | ED98                       | CP001781                    | <a href="#">19884497</a> |
| 1231                                                                                                                                  | JKD6008                    | CP002120                    | <a href="#">20802046</a> |
| 1233                                                                                                                                  | TCH60                      | CP002110                    |                          |
| 1236                                                                                                                                  | MN8                        | CM000952                    |                          |
| 1238                                                                                                                                  | CF-Marseille               | PRJEA28687                  |                          |
| 1239                                                                                                                                  | TCH130                     | PRJNA31541                  |                          |
| 1240                                                                                                                                  | TCH70                      | PRJNA31543                  |                          |
| 1351                                                                                                                                  | A5937                      | PRJNA36465                  |                          |
| 1352                                                                                                                                  | A5948                      | PRJNA36467                  |                          |
| 1353                                                                                                                                  | A6224                      | PRJNA36469                  |                          |
| 1355                                                                                                                                  | A8115                      | PRJNA36473                  |                          |
| 1357                                                                                                                                  | A9635                      | PRJNA36477                  |                          |
| 1358                                                                                                                                  | A9719                      | PRJNA36479                  |                          |
| 1359                                                                                                                                  | A9763                      | PRJNA36481                  |                          |
| 1361                                                                                                                                  | 132                        | PRJNA37915                  | <a href="#">19581398</a> |
| 1943                                                                                                                                  | 199/08                     | SRR445025                   | <a href="#">22354957</a> |
| 1944                                                                                                                                  | DC57_BP_GEN_I_7            | SRR445026                   | <a href="#">22354957</a> |
| 1945                                                                                                                                  | 12152-5                    | SRR445027                   | <a href="#">22354957</a> |
| 1946                                                                                                                                  | 25207-25126/08             | SRR445028                   | <a href="#">22354957</a> |
| 1948                                                                                                                                  | 44523-1                    | SRR445030                   | <a href="#">22354957</a> |
| 1951                                                                                                                                  | 41091                      | SRR445032                   | <a href="#">22354957</a> |
| 1952                                                                                                                                  | 7-109                      | SRR445033                   | <a href="#">22354957</a> |
| 1955                                                                                                                                  | 41093                      | SRR445036                   | <a href="#">22354957</a> |
| 1956                                                                                                                                  | M2009_10003479             | SRR445037                   | <a href="#">22354957</a> |
| 1957                                                                                                                                  | M2009_10004208             | SRR445038                   | <a href="#">22354957</a> |
| 1958                                                                                                                                  | P23-10_WZ-103              | SRR445039                   | <a href="#">22354957</a> |
| 1960                                                                                                                                  | P23-12_HF-80520            | SRR445041                   | <a href="#">22354957</a> |
| 1963                                                                                                                                  | 47771                      | SRR445045                   | <a href="#">22354957</a> |

|      |                  |            |                          |
|------|------------------|------------|--------------------------|
| 1964 | 50148            | SRR445053  | <a href="#">22354957</a> |
| 1967 | UB08187          | SRR445066  | <a href="#">22354957</a> |
| 1968 | 089B_2           | SRR445071  | <a href="#">22354957</a> |
| 1969 | 34-M-B-1_11      | SRR445072  | <a href="#">22354957</a> |
| 1970 | 60036            | SRR445073  | <a href="#">22354957</a> |
| 1971 | 61888            | SRR445074  | <a href="#">22354957</a> |
| 1972 | 62951            | SRR445075  | <a href="#">22354957</a> |
| 1973 | P23-14_SD4.1     | SRR445076  | <a href="#">22354957</a> |
| 1974 | ST20071083       | SRR445077  | <a href="#">22354957</a> |
| 1975 | ST20082015       | SRR445078  | <a href="#">22354957</a> |
| 1976 | ST20090121       | SRR445079  | <a href="#">22354957</a> |
| 1978 | ST20091526       | SRR445081  | <a href="#">22354957</a> |
| 1980 | ST20100011       | SRR445083  | <a href="#">22354957</a> |
| 1982 | ST20101526       | SRR445085  | <a href="#">22354957</a> |
| 1985 | 3-S-1            | SRR445229  | <a href="#">22354957</a> |
| 1988 | 13349_2          | SRR445232  | <a href="#">22354957</a> |
| 1991 | 1953             | SRR445235  | <a href="#">22354957</a> |
| 1992 | 2008-60-3254     | SRR445236  | <a href="#">22354957</a> |
| 1996 | 324              | SRR445240  | <a href="#">22354957</a> |
| 1997 | F10              | SRR445241  | <a href="#">22354957</a> |
| 2006 | T3               | SRR445268  | <a href="#">22354957</a> |
| 2011 | 2007-70-95-9-SPA | SRR445273  | <a href="#">22354957</a> |
| 2016 | 23225            | SRR445278  | <a href="#">22354957</a> |
| 2019 | 7SPA_72-13850-1  | SRR445281  | <a href="#">22354957</a> |
| 2030 | ED133            | PRJNA41277 | <a href="#">20624747</a> |
| 2031 | DC38_BP_TET_F_7  | SRR445293  | <a href="#">22354957</a> |
| 2032 | JKD6159          | PRJNA50759 | <a href="#">20729356</a> |
| 2034 | TW20 0582        | PRJEA36647 | <a href="#">19948800</a> |
| 2035 | ECT-R 2          | PRJEA52833 | <a href="#">21590357</a> |
| 2036 | T0131            | PRJNA65323 | <a href="#">21551295</a> |
| 2117 | 55/2798          | SRR016399  | <a href="#">15811459</a> |
| 2118 | SRR493912        | SRR493912  |                          |
| 2119 | 58-362           | SRR016782  | <a href="#">15811459</a> |
| 2122 | 65-20            | SRR016389  | <a href="#">15811459</a> |
| 2123 | 66-1888          | SRR016781  | <a href="#">15811459</a> |
| 2134 | M1016            | SRR016780  | <a href="#">15811459</a> |
| 2142 | 75916            | SRR016393  | <a href="#">15811459</a> |
| 2201 | T6C18            | ERR023500  |                          |
| 2206 | ERR017170        | ERR017170  | <a href="#">23299977</a> |
| 2207 | ERR017173        | ERR017173  | <a href="#">23299977</a> |
| 2209 | ERR017181        | ERR017181  | <a href="#">23299977</a> |
| 2211 | ERR017604        | ERR017604  |                          |
| 2215 | ERR017617        | ERR017617  |                          |
| 2231 | ERR033239        | ERR033239  |                          |
| 2233 | ERR033245        | ERR033245  |                          |
| 2234 | ERR033248        | ERR033248  |                          |
| 2236 | ERR120479        | ERR120479  |                          |
| 2238 | ERR048343        | ERR048343  |                          |
| 2243 | ERR084721        | ERR084721  |                          |
| 2245 | P4               | ERR070044  | <a href="#">23158674</a> |

|      |           |            |                          |
|------|-----------|------------|--------------------------|
| 2246 | ERR048352 | ERR048352  |                          |
| 2247 | ERR048356 | ERR048356  |                          |
| 2260 | ERR084512 | ERR084512  |                          |
| 2263 | ERR086060 | ERR086060  |                          |
| 2267 | ERR085402 | ERR085402  | <a href="#">23158678</a> |
| 2272 | ERR108047 | ERR108047  |                          |
| 2273 | ERR108050 | ERR108050  |                          |
| 2278 | ERR083741 | ERR083741  | <a href="#">22393007</a> |
| 2279 | ERR083719 | ERR083719  | <a href="#">22393007</a> |
| 2281 | SRR492703 | SRR492703  |                          |
| 2282 | SRR492666 | SRR492666  |                          |
| 2284 | SRR492672 | SRR492672  |                          |
| 2287 | SRR497512 | SRR497512  |                          |
| 2292 | JKD6260   | SRR073227  |                          |
| 2294 | 11819-97  | PRJNA78269 | <a href="#">22374956</a> |
| 2295 | M013      | PRJNA78007 | <a href="#">22328755</a> |
| 2298 | LGA251    | PRJEA62883 | <a href="#">21641281</a> |
| 2299 | MSHR1132  | PRJEA62885 | <a href="#">21813488</a> |
| 2305 | JKD6023   | SRR088300  |                          |
| 2308 | ERR045851 | ERR045851  |                          |
| 2313 | ERR119047 | ERR119047  |                          |
| 2318 | A10102    | SRR016128  |                          |
| 2333 | SRR279123 | SRR279123  |                          |
| 2348 | A9638     | SRR016134  |                          |
| 2352 | A9639     | SRR016141  |                          |
| 2359 | D_2       | ERR127412  | <a href="#">22674929</a> |
| 2367 | I         | ERR127441  | <a href="#">22674929</a> |
| 2369 | K         | ERR127442  | <a href="#">22674929</a> |
| 2370 | L         | ERR127443  | <a href="#">22674929</a> |
| 2371 | M         | ERR127447  | <a href="#">22674929</a> |
| 2372 | N         | ERR127444  | <a href="#">22674929</a> |
| 2374 | P         | ERR127445  | <a href="#">22674929</a> |
| 2375 | Q         | ERR127432  | <a href="#">22674929</a> |
| 2384 | H         | ERR127417  | <a href="#">22674929</a> |
| 2385 | 03.1791.F | SRR453031  | <a href="#">22586109</a> |
| 2388 | 07.1696.F | SRR453034  | <a href="#">22586109</a> |
| 2391 | 07.2449.K | SRR453037  | <a href="#">22586109</a> |
| 2394 | 07.2880.V | SRR453040  | <a href="#">22586109</a> |
| 2395 | 07.3841.N | SRR453041  | <a href="#">22586109</a> |
| 2404 | 3366      | SRR453075  | <a href="#">1087651</a>  |
| 2408 | BK2421    | ERR064899  | <a href="#">20093474</a> |
| 2409 | LHH1      | ERR064900  | <a href="#">20093474</a> |
| 2410 | R35       | ERR064901  |                          |
| 2411 | GRE18     | ERR064902  | <a href="#">20093474</a> |
| 2412 | GRE317    | ERR064903  | <a href="#">20093474</a> |
| 2414 | TUR9      | ERR064905  | <a href="#">20093474</a> |
| 2415 | TUR1      | ERR064906  | <a href="#">20093474</a> |
| 2424 | CHL1      | ERR064915  | <a href="#">20093474</a> |
| 2425 | CHL151    | ERR064916  | <a href="#">20093474</a> |
| 2426 | BRA36     | ERR064917  | <a href="#">20093474</a> |

|      |            |           |                          |
|------|------------|-----------|--------------------------|
| 2427 | BZ48       | ERR064918 | <a href="#">20093474</a> |
| 2429 | HSJ216     | ERR064920 | <a href="#">20093474</a> |
| 2434 | URU34      | ERR064925 | <a href="#">20093474</a> |
| 2436 | HU106      | ERR064927 | <a href="#">20093474</a> |
| 2445 | GRE108     | ERR064936 | <a href="#">20093474</a> |
| 2449 | S130       | ERR064940 | <a href="#">20093474</a> |
| 2453 | S40        | ERR064944 | <a href="#">20093474</a> |
| 2455 | S7         | ERR064946 | <a href="#">20093474</a> |
| 2463 | S78        | ERR064954 | <a href="#">20093474</a> |
| 2464 | S42        | ERR064955 | <a href="#">20093474</a> |
| 2469 | 700059     | ERR017268 | <a href="#">23299977</a> |
| 2470 | 600896     | ERR017278 | <a href="#">23299977</a> |
| 2471 | 300220     | ERR017293 | <a href="#">23299977</a> |
| 2472 | 403100     | ERR017300 | <a href="#">23299977</a> |
| 2491 | ERR026667  | ERR026667 | <a href="#">23270620</a> |
| 2500 | ERR029473  | ERR029473 |                          |
| 2502 | ERR030263  | ERR030263 |                          |
| 2505 | 5336-03    | ERR120408 |                          |
| 2510 | ERR033380  | ERR033380 |                          |
| 2515 | ERR033430  | ERR033430 |                          |
| 2516 | ERR033516  | ERR033516 |                          |
| 2523 | SRR088299  | SRR088299 | <a href="#">22102812</a> |
| 2527 | SRR304676  | SRR304676 | <a href="#">21912685</a> |
| 2531 | ERR038659  | ERR038659 |                          |
| 2546 | 703347     | ERR017238 | <a href="#">23299977</a> |
| 2547 | 601650     | ERR017285 | <a href="#">23299977</a> |
| 2551 | ERR025804  | ERR025804 | <a href="#">23270620</a> |
| 2557 | ERR030155  | ERR030155 |                          |
| 2562 | ERR030275  | ERR030275 |                          |
| 2566 | 5584-04    | ERR120459 |                          |
| 2567 | 10C_repeat | ERR101899 | <a href="#">22693998</a> |
| 2570 | 14C_repeat | ERR103395 | <a href="#">22693998</a> |
| 2575 | 19B_repeat | ERR103400 | <a href="#">22693998</a> |
| 2576 | 1B_repeat  | ERR103401 | <a href="#">22693998</a> |
| 2577 | 20B_repeat | ERR103402 | <a href="#">22693998</a> |
| 2578 | 6C_repeat  | ERR103403 | <a href="#">22693998</a> |
| 2581 | ERR033266  | ERR033266 |                          |
| 2584 | ERR033341  | ERR033341 |                          |
| 2586 | ERR033418  | ERR033418 |                          |
| 2638 | ERR048394  | ERR048394 |                          |
| 2645 | SRR031227  | SRR031227 |                          |
| 2646 | SRR031228  | SRR031228 |                          |
| 2663 | ASARM156   | ERR084577 |                          |
| 2665 | ERR084631  | ERR084631 |                          |
| 2666 | ASARM187   | ERR084656 |                          |
| 2669 | ERR084730  | ERR084730 |                          |
| 2671 | 83430188   | ERR086106 |                          |
| 2672 | 90180032   | ERR086129 |                          |
| 2673 | 83080257   | ERR086073 |                          |
| 2684 | ERR070035  | ERR070035 | <a href="#">23158674</a> |

|      |              |            |                          |
|------|--------------|------------|--------------------------|
| 2688 | ERR131804    | ERR131804  | <a href="#">23158674</a> |
| 2690 | SRR492709    | SRR492709  |                          |
| 2701 | SRR497538    | SRR497538  |                          |
| 2704 | SRR497587    | SRR497587  |                          |
| 2706 | ERR048494    | ERR048494  |                          |
| 2716 | ERR084590    | ERR084590  |                          |
| 2717 | ERR084614    | ERR084614  |                          |
| 2721 | ERR084747    | ERR084747  |                          |
| 2722 | ERR084760    | ERR084760  |                          |
| 2725 | SRR016396    | SRR016396  |                          |
| 2733 | ERR033683    | ERR033683  |                          |
| 2734 | SRR016388    | SRR016388  |                          |
| 2744 | ERR038666    | ERR038666  |                          |
| 2746 | ERR048387    | ERR048387  |                          |
| 2750 | ERR033302    | ERR033302  |                          |
| 2751 | ERR033351    | ERR033351  |                          |
| 2752 | ERR033369    | ERR033369  |                          |
| 2754 | ERR033409    | ERR033409  |                          |
| 2755 | ERR033437    | ERR033437  |                          |
| 2759 | ERR033524    | ERR033524  |                          |
| 2777 | SRR016397    | SRR016397  |                          |
| 2780 | SRR088896    | SRR088896  |                          |
| 2814 | SRR016387    | SRR016387  |                          |
| 2816 | SRR277418    | SRR277418  |                          |
| 2871 | HO5378059211 | ERR038046  |                          |
| 2874 | HO7258047505 | ERR038049  |                          |
| 2881 | NL0113995    | ERR038056  |                          |
| 2885 | Btn1626      | ERR038060  | <a href="#">23299977</a> |
| 2891 | MRSA354      | ERR038066  |                          |
| 2897 | Btn2292      | ERR038072  |                          |
| 2902 | ARI10        | ERR038077  |                          |
| 2903 | ARI11        | ERR038078  |                          |
| 2911 | ARI16        | ERR038086  |                          |
| 2912 | ARI17        | ERR038087  |                          |
| 2915 | ARI23        | ERR038090  |                          |
| 2921 | W44936       | ERR038096  |                          |
| 2933 | RH0600013805 | ERR038108  |                          |
| 2990 | 10000174     | ERR044560  |                          |
| 3001 | 10000195     | ERR044571  |                          |
| 3030 | 72580475     | ERR044600  |                          |
| 3031 | 72860467     | ERR044601  |                          |
| 3035 | 8000258      | ERR045054  |                          |
| 3036 | 8000268      | ERR045055  |                          |
| 3037 | 10000141     | ERR045056  |                          |
| 3040 | 10000148     | ERR045059  |                          |
| 3041 | 10000149     | ERR045060  |                          |
| 3102 | VC40         | PRJNA66591 | <a href="#">22461548</a> |

| <b>Figure 4B</b>                                                                           |                            |                             |                          |
|--------------------------------------------------------------------------------------------|----------------------------|-----------------------------|--------------------------|
| <b>Database:</b> <a href="http://pubmlst.org/rmlst/">http://pubmlst.org/rmlst/</a>         |                            |                             |                          |
| <b>Project name:</b> Maiden 2013 Nat Rev S aureus (699)                                    |                            |                             |                          |
| <b>Project id:</b> 45                                                                      |                            |                             |                          |
| <b>Description:</b> 699 <i>S. aureus</i> isolates included in species level rMLST analysis |                            |                             |                          |
| <b>BIGSdb ID</b>                                                                           | <b>BIGSdb isolate name</b> | <b>ENA accession number</b> | <b>References</b>        |
| 55                                                                                         | RF122                      | AJ938182                    | <a href="#">17971880</a> |
| 56                                                                                         | NCTC 8325                  | CP000253                    |                          |
| 58                                                                                         | COL                        | CP000046                    | <a href="#">15774886</a> |
| 59                                                                                         | Mu50                       | BA000017                    | <a href="#">11418146</a> |
|                                                                                            |                            |                             | <a href="#">15141945</a> |
| 60                                                                                         | N315                       | BA000018                    | <a href="#">11418146</a> |
| 61                                                                                         | USA300_TCH1516             | CP000730                    | <a href="#">17986343</a> |
| 62                                                                                         | JH1                        | CP000736                    | <a href="#">17517606</a> |
| 63                                                                                         | JH9                        | CP000703                    | <a href="#">17517606</a> |
| 64                                                                                         | USA300_FPR3757             | CP000255                    | <a href="#">16517273</a> |
| 65                                                                                         | Mu3                        | AP009324                    | <a href="#">9400512</a>  |
|                                                                                            |                            |                             | <a href="#">17954695</a> |
| 66                                                                                         | Newman                     | AP009351                    | <a href="#">17951380</a> |
| 67                                                                                         | MRSA252                    | BX571856                    | <a href="#">15213324</a> |
| 68                                                                                         | MSSA476                    | BX571857                    | <a href="#">15213324</a> |
| 69                                                                                         | MW2                        | BA000033                    | <a href="#">12044378</a> |
| 165                                                                                        | ED98                       | CP001781                    | <a href="#">19884497</a> |
| 1063                                                                                       | USA300_TCH1516             | CP000730                    | <a href="#">17986343</a> |
| 1070                                                                                       | ED98                       | CP001781                    | <a href="#">19884497</a> |
| 1231                                                                                       | JKD6008                    | CP002120                    | <a href="#">20802046</a> |
| 1233                                                                                       | TCH60                      | CP002110                    |                          |
| 1234                                                                                       | USA300_FPR3757             | CP000255                    | <a href="#">16517273</a> |
| 1236                                                                                       | MN8                        | CM000952                    |                          |
| 1237                                                                                       | Mu50-omega                 | BABM01000001                | <a href="#">19124662</a> |
| 1238                                                                                       | CF-Marseille               | PRJEA28687                  |                          |
| 1239                                                                                       | TCH130                     | PRJNA31541                  |                          |
| 1240                                                                                       | TCH70                      | PRJNA31543                  |                          |
| 1351                                                                                       | A5937                      | PRJNA36465                  |                          |
| 1352                                                                                       | A5948                      | PRJNA36467                  |                          |
| 1353                                                                                       | A6224                      | PRJNA36469                  |                          |
| 1354                                                                                       | A6300                      | PRJNA36471                  |                          |
| 1355                                                                                       | A8115                      | PRJNA36473                  |                          |
| 1356                                                                                       | A9299                      | PRJNA36475                  |                          |
| 1357                                                                                       | A9635                      | PRJNA36477                  |                          |
| 1358                                                                                       | A9719                      | PRJNA36479                  |                          |
| 1359                                                                                       | A9763                      | PRJNA36481                  |                          |
| 1360                                                                                       | A9781                      | PRJNA36483                  |                          |
| 1361                                                                                       | 132                        | PRJNA37915                  | <a href="#">19581398</a> |
| 1943                                                                                       | 199/08                     | SRR445025                   | <a href="#">22354957</a> |
| 1944                                                                                       | DC57_BP_GEN_I_7            | SRR445026                   | <a href="#">22354957</a> |
| 1945                                                                                       | 12152-5                    | SRR445027                   | <a href="#">22354957</a> |
| 1946                                                                                       | 25207-25126/08             | SRR445028                   | <a href="#">22354957</a> |
| 1947                                                                                       | 30116                      | SRR445029                   | <a href="#">22354957</a> |
| 1948                                                                                       | 44523-1                    | SRR445030                   | <a href="#">22354957</a> |

|      |                  |            |                          |
|------|------------------|------------|--------------------------|
| 1950 | 6919/08          | SRR445031  | <a href="#">22354957</a> |
| 1951 | 41091            | SRR445032  | <a href="#">22354957</a> |
| 1952 | 7-109            | SRR445033  | <a href="#">22354957</a> |
| 1953 | 41102            | SRR445034  | <a href="#">22354957</a> |
| 1954 | 41104            | SRR445035  | <a href="#">22354957</a> |
| 1955 | 41093            | SRR445036  | <a href="#">22354957</a> |
| 1956 | M2009_10003479   | SRR445037  | <a href="#">22354957</a> |
| 1957 | M2009_10004208   | SRR445038  | <a href="#">22354957</a> |
| 1958 | P23-10_WZ-103    | SRR445039  | <a href="#">22354957</a> |
| 1959 | P23-11_HF-446    | SRR445040  | <a href="#">22354957</a> |
| 1960 | P23-12_HF-80520  | SRR445041  | <a href="#">22354957</a> |
| 1961 | P23-13_HF-724402 | SRR445042  | <a href="#">22354957</a> |
| 1962 | P23-9_WZ-1       | SRR445043  | <a href="#">22354957</a> |
| 1963 | 47771            | SRR445045  | <a href="#">22354957</a> |
| 1964 | 50148            | SRR445053  | <a href="#">22354957</a> |
| 1965 | 51726            | SRR445057  | <a href="#">22354957</a> |
| 1966 | UB08116          | SRR445060  | <a href="#">22354957</a> |
| 1967 | UB08187          | SRR445066  | <a href="#">22354957</a> |
| 1968 | 089B_2           | SRR445071  | <a href="#">22354957</a> |
| 1969 | 34-M-B-1_11      | SRR445072  | <a href="#">22354957</a> |
| 1970 | 60036            | SRR445073  | <a href="#">22354957</a> |
| 1971 | 61888            | SRR445074  | <a href="#">22354957</a> |
| 1972 | 62951            | SRR445075  | <a href="#">22354957</a> |
| 1973 | P23-14_SD4.1     | SRR445076  | <a href="#">22354957</a> |
| 1974 | ST20071083       | SRR445077  | <a href="#">22354957</a> |
| 1975 | ST20082015       | SRR445078  | <a href="#">22354957</a> |
| 1976 | ST20090121       | SRR445079  | <a href="#">22354957</a> |
| 1977 | ST20091155       | SRR445080  | <a href="#">22354957</a> |
| 1978 | ST20091526       | SRR445081  | <a href="#">22354957</a> |
| 1979 | ST20091826       | SRR445082  | <a href="#">22354957</a> |
| 1980 | ST20100011       | SRR445083  | <a href="#">22354957</a> |
| 1981 | ST20100537       | SRR445084  | <a href="#">22354957</a> |
| 1982 | ST20101526       | SRR445085  | <a href="#">22354957</a> |
| 1983 | LY19990171       | SRR445086  | <a href="#">22354957</a> |
| 1984 | USA42            | SRR445228  | <a href="#">22354957</a> |
| 1985 | 3-S-1            | SRR445229  | <a href="#">22354957</a> |
| 1986 | Ve08/003845st    | SRR445230  | <a href="#">22354957</a> |
| 1987 | PR7/08           | SRR445231  | <a href="#">22354957</a> |
| 1988 | 13349_2          | SRR445232  | <a href="#">22354957</a> |
| 1989 | 09/01691/3       | SRR445233  | <a href="#">22354957</a> |
| 1990 | 1061             | SRR445234  | <a href="#">22354957</a> |
| 1991 | 1953             | SRR445235  | <a href="#">22354957</a> |
| 1992 | 2008-60-3254     | SRR445236  | <a href="#">22354957</a> |
| 1993 | 2008-60-970      | SRR445237  | <a href="#">22354957</a> |
| 1994 | 2046             | SRR445238  | <a href="#">22354957</a> |
| 1995 | 29139            | SRR445239  | <a href="#">22354957</a> |
| 1996 | 324              | SRR445240  | <a href="#">22354957</a> |
| 1997 | F10              | SRR445241  | <a href="#">22354957</a> |
| 1998 | F20              | SRR445242  | <a href="#">22354957</a> |
| 1999 | 04-02981         | PRJNA34809 | <a href="#">20386717</a> |

|      |                  |            |                          |
|------|------------------|------------|--------------------------|
| 2000 | P23-03_SW181.1   | SRR445262  | <a href="#">22354957</a> |
| 2001 | P23-01_SW31.1    | SRR445263  | <a href="#">22354957</a> |
| 2002 | SW356            | SRR445264  | <a href="#">22354957</a> |
| 2003 | P23-02_SW62.1    | SRR445265  | <a href="#">22354957</a> |
| 2004 | SWK35            | SRR445266  | <a href="#">22354957</a> |
| 2005 | T2               | SRR445267  | <a href="#">22354957</a> |
| 2006 | T3               | SRR445268  | <a href="#">22354957</a> |
| 2007 | T4               | SRR445269  | <a href="#">22354957</a> |
| 2009 | T6               | SRR445271  | <a href="#">22354957</a> |
| 2010 | T7               | SRR445272  | <a href="#">22354957</a> |
| 2011 | 2007-70-95-9-SPA | SRR445273  | <a href="#">22354957</a> |
| 2012 | 2007-70-92-6-SPA | SRR445274  | <a href="#">22354957</a> |
| 2013 | 2007-70-91-4-SPA | SRR445275  | <a href="#">22354957</a> |
| 2014 | 2008-60-1662-5   | SRR445276  | <a href="#">22354957</a> |
| 2015 | 9B               | SRR445277  | <a href="#">22354957</a> |
| 2016 | 23225            | SRR445278  | <a href="#">22354957</a> |
| 2017 | AV4_1            | SRR445279  | <a href="#">22354957</a> |
| 2018 | 51225            | SRR445280  | <a href="#">22354957</a> |
| 2019 | 7SPA_72-13850-1  | SRR445281  | <a href="#">22354957</a> |
| 2021 | 13349_6          | SRR445283  | <a href="#">22354957</a> |
| 2022 | 23824            | SRR445284  | <a href="#">22354957</a> |
| 2030 | ED133            | PRJNA41277 | <a href="#">20624747</a> |
| 2031 | DC38_BP_TET_F_7  | SRR445293  | <a href="#">22354957</a> |
| 2032 | JKD6159          | PRJNA50759 | <a href="#">20729356</a> |
| 2033 | ST398            | PRJEA29427 | <a href="#">20546576</a> |
| 2034 | TW20 0582        | PRJEA36647 | <a href="#">19948800</a> |
| 2035 | ECT-R 2          | PRJEA52833 | <a href="#">21590357</a> |
| 2036 | T0131            | PRJNA65323 | <a href="#">21551295</a> |
| 2099 | TW20             | PRJEA36647 | <a href="#">17243050</a> |
|      |                  |            | <a href="#">19948800</a> |
| 2114 | 01.7997.S        | SRR016390  | <a href="#">15811459</a> |
| 2117 | 55/2798          | SRR016399  | <a href="#">15811459</a> |
| 2118 | SRR493912        | SRR493912  |                          |
| 2119 | 58-362           | SRR016782  | <a href="#">15811459</a> |
| 2122 | 65-20            | SRR016389  | <a href="#">15811459</a> |
| 2123 | 66-1888          | SRR016781  | <a href="#">15811459</a> |
| 2124 | SRR494917        | SRR494917  |                          |
| 2125 | 68-81            | SRR016400  | <a href="#">15811459</a> |
| 2126 | 69-172           | SRR016391  | <a href="#">15811459</a> |
| 2127 | 69-412           | SRR016783  | <a href="#">15811459</a> |
| 2134 | M1016            | SRR016780  | <a href="#">15811459</a> |
| 2142 | 75916            | SRR016393  | <a href="#">15811459</a> |
| 2201 | T6C18            | ERR023500  |                          |
| 2202 | T6C26            | ERR023503  |                          |
| 2203 | T6N23            | ERR023506  |                          |
| 2204 | T6N15            | ERR023512  |                          |
| 2205 | T6N3             | ERR023515  |                          |
| 2206 | ERR017170        | ERR017170  | <a href="#">23299977</a> |
| 2207 | ERR017173        | ERR017173  | <a href="#">23299977</a> |
| 2209 | ERR017181        | ERR017181  | <a href="#">23299977</a> |



|      |           |           |                          |
|------|-----------|-----------|--------------------------|
| 2211 | ERR017604 | ERR017604 |                          |
| 2212 | ERR017607 | ERR017607 |                          |
| 2213 | ERR017610 | ERR017610 |                          |
| 2214 | ERR017614 | ERR017614 |                          |
| 2215 | ERR017617 | ERR017617 |                          |
| 2216 | ERR024669 | ERR024669 | <a href="#">23270620</a> |
| 2217 | ERR024672 | ERR024672 | <a href="#">23270620</a> |
| 2218 | ERR024675 | ERR024675 | <a href="#">23270620</a> |
| 2219 | ERR024678 | ERR024678 | <a href="#">23270620</a> |
| 2220 | ERR024682 | ERR024682 | <a href="#">23270620</a> |
| 2221 | ERR029344 | ERR029344 |                          |
| 2222 | ERR029347 | ERR029347 |                          |
| 2223 | ERR029350 | ERR029350 |                          |
| 2224 | ERR029353 | ERR029353 |                          |
| 2225 | ERR029357 | ERR029357 |                          |
| 2226 | ERR120359 | ERR120359 |                          |
| 2227 | ERR120362 | ERR120362 |                          |
| 2228 | ERR120365 | ERR120365 |                          |
| 2229 | ERR120368 | ERR120368 |                          |
| 2230 | ERR120371 | ERR120371 |                          |
| 2231 | ERR033239 | ERR033239 |                          |
| 2233 | ERR033245 | ERR033245 |                          |
| 2234 | ERR033248 | ERR033248 |                          |
| 2235 | ERR033252 | ERR033252 |                          |
| 2236 | ERR120479 | ERR120479 |                          |
| 2238 | ERR048343 | ERR048343 |                          |
| 2239 | ERR109269 | ERR109269 |                          |
| 2240 | ERR044210 | ERR044210 | <a href="#">22205512</a> |
| 2241 | ERR084496 | ERR084496 |                          |
| 2242 | ERR084691 | ERR084691 |                          |
| 2243 | ERR084721 | ERR084721 |                          |
| 2244 | ERR086064 | ERR086064 |                          |
| 2245 | P4        | ERR070044 | <a href="#">23158674</a> |
| 2246 | ERR048352 | ERR048352 |                          |
| 2247 | ERR048356 | ERR048356 |                          |
| 2248 | ERR048359 | ERR048359 |                          |
| 2249 | ERR048362 | ERR048362 |                          |
| 2250 | ERR048365 | ERR048365 |                          |
| 2252 | ERR044178 | ERR044178 | <a href="#">22205512</a> |
| 2253 | ERR044190 | ERR044190 | <a href="#">22205512</a> |
| 2254 | ERR044202 | ERR044202 | <a href="#">22205512</a> |
| 2255 | ERR044214 | ERR044214 | <a href="#">22205512</a> |
| 2256 | ERR084500 | ERR084500 |                          |
| 2257 | ERR084503 | ERR084503 |                          |
| 2258 | ERR084506 | ERR084506 |                          |
| 2259 | ERR084509 | ERR084509 |                          |
| 2260 | ERR084512 | ERR084512 |                          |
| 2261 | ERR086054 | ERR086054 |                          |
| 2262 | ERR086057 | ERR086057 |                          |
| 2263 | ERR086060 | ERR086060 |                          |

|      |              |            |                          |
|------|--------------|------------|--------------------------|
| 2264 | ERR086063    | ERR086063  |                          |
| 2265 | ERR086066    | ERR086066  |                          |
| 2266 | ERR072252    | ERR072252  | <a href="#">23158674</a> |
| 2267 | ERR085402    | ERR085402  | <a href="#">23158678</a> |
| 2268 | ERR085405    | ERR085405  | <a href="#">23158678</a> |
| 2269 | ERR085408    | ERR085408  | <a href="#">23158678</a> |
| 2270 | ERR085411    | ERR085411  | <a href="#">23158678</a> |
| 2271 | ERR108044    | ERR108044  |                          |
| 2272 | ERR108047    | ERR108047  |                          |
| 2273 | ERR108050    | ERR108050  |                          |
| 2274 | ERR108053    | ERR108053  |                          |
| 2276 | ERR108039    | ERR108039  |                          |
| 2277 | ERR083697    | ERR083697  | <a href="#">22393007</a> |
| 2278 | ERR083741    | ERR083741  | <a href="#">22393007</a> |
| 2279 | ERR083719    | ERR083719  | <a href="#">22393007</a> |
| 2280 | SRR449536    | SRR449536  |                          |
| 2281 | SRR492703    | SRR492703  |                          |
| 2282 | SRR492666    | SRR492666  |                          |
| 2283 | SRR492669    | SRR492669  |                          |
| 2284 | SRR492672    | SRR492672  |                          |
| 2285 | SRR492675    | SRR492675  |                          |
| 2286 | SRR492678    | SRR492678  |                          |
| 2287 | SRR497512    | SRR497512  |                          |
| 2290 | HO 5096 0412 | PRJEA71279 |                          |
| 2291 | JKD6272      | SRR073304  |                          |
| 2292 | JKD6260      | SRR073227  |                          |
| 2293 | JKD6177      | SRR073305  |                          |
| 2294 | 11819-97     | PRJNA78269 | <a href="#">22374956</a> |
| 2295 | M013         | PRJNA78007 | <a href="#">22328755</a> |
| 2298 | LGA251       | PRJEA62883 | <a href="#">21641281</a> |
| 2299 | MSHR1132     | PRJEA62885 | <a href="#">21813488</a> |
| 2301 | JKD6001      | SRR088296  |                          |
| 2302 | JKD6004      | SRR088297  |                          |
| 2303 | JKD6005      | SRR088298  |                          |
| 2304 | JKD6021      | SRR088298  |                          |
| 2305 | JKD6023      | SRR088300  |                          |
| 2306 | JKD6052      | SRR088302  |                          |
| 2307 | JKD6051      | SRR088301  |                          |
| 2308 | ERR045851    | ERR045851  |                          |
| 2309 | ERR109270    | ERR109270  |                          |
| 2310 | ERR109275    | ERR109275  |                          |
| 2311 | ERR119000    | ERR119000  |                          |
| 2312 | ERR119009    | ERR119009  |                          |
| 2313 | ERR119047    | ERR119047  |                          |
| 2314 | ERR046408    | ERR046408  | <a href="#">22205512</a> |
| 2315 | SRR449531    | SRR449531  |                          |
| 2316 | A9788        | SRR016122  |                          |
| 2318 | A10102       | SRR016128  |                          |
| 2319 | A10136       | SRR016130  |                          |
| 2320 | A10103       | SRR016131  |                          |

|      |           |           |                          |
|------|-----------|-----------|--------------------------|
| 2321 | A9744     | SRR016139 |                          |
| 2324 | A10135    | SRR016145 |                          |
| 2325 | A9798     | SRR016147 |                          |
| 2326 | A10154    | SRR016149 |                          |
| 2327 | A9719     | SRR016153 |                          |
| 2328 | A9781     | SRR016155 |                          |
| 2329 | A9299     | SRR016156 |                          |
| 2333 | SRR279123 | SRR279123 |                          |
| 2338 | A10155    | SRR016148 |                          |
| 2342 | A8796     | SRR016151 |                          |
| 2343 | 702987    | ERR017251 | <a href="#">23299977</a> |
| 2344 | 702159    | ERR017259 | <a href="#">23299977</a> |
| 2346 | A9635     | SRR016127 |                          |
| 2348 | A9638     | SRR016134 |                          |
| 2349 | A8118     | SRR016135 |                          |
| 2350 | A8392     | SRR016136 |                          |
| 2351 | A6226     | SRR016137 |                          |
| 2352 | A9639     | SRR016141 |                          |
| 2353 | A9637     | SRR016142 |                          |
| 2356 | A5937     | SRR016150 |                          |
| 2357 | A6224     | SRR016152 |                          |
| 2358 | SRR494945 | SRR494945 |                          |
| 2359 | D_2       | ERR127412 | <a href="#">22674929</a> |
| 2360 | A         | ERR127410 | <a href="#">22674929</a> |
| 2361 | E         | ERR127408 | <a href="#">22674929</a> |
| 2362 | B         | ERR127414 | <a href="#">22674929</a> |
| 2363 | G         | ERR127409 | <a href="#">22674929</a> |
| 2364 | C         | ERR127415 | <a href="#">22674929</a> |
| 2365 | F         | ERR127413 | <a href="#">22674929</a> |
| 2366 | H_2       | ERR127411 | <a href="#">22674929</a> |
| 2367 | I         | ERR127441 | <a href="#">22674929</a> |
| 2369 | K         | ERR127442 | <a href="#">22674929</a> |
| 2370 | L         | ERR127443 | <a href="#">22674929</a> |
| 2371 | M         | ERR127447 | <a href="#">22674929</a> |
| 2372 | N         | ERR127444 | <a href="#">22674929</a> |
| 2373 | O         | ERR127448 | <a href="#">22674929</a> |
| 2374 | P         | ERR127445 | <a href="#">22674929</a> |
| 2375 | Q         | ERR127432 | <a href="#">22674929</a> |
| 2376 | R         | ERR127433 | <a href="#">22674929</a> |
| 2377 | S         | ERR127429 | <a href="#">22674929</a> |
| 2378 | T         | ERR127428 | <a href="#">22674929</a> |
| 2379 | U         | ERR127426 | <a href="#">22674929</a> |
| 2380 | V         | ERR127427 | <a href="#">22674929</a> |
| 2381 | W         | ERR127431 | <a href="#">22674929</a> |
| 2382 | X         | ERR127430 | <a href="#">22674929</a> |
| 2383 | D         | ERR127416 | <a href="#">22674929</a> |
| 2384 | H         | ERR127417 | <a href="#">22674929</a> |
| 2385 | 03.1791.F | SRR453031 | <a href="#">22586109</a> |
| 2386 | 06.9570.L | SRR453032 | <a href="#">22586109</a> |
| 2387 | 07.1227.Z | SRR453033 | <a href="#">22586109</a> |

|      |           |           |                          |
|------|-----------|-----------|--------------------------|
| 2388 | 07.1696.F | SRR453034 | <a href="#">22586109</a> |
| 2389 | 07.1712.D | SRR453035 | <a href="#">22586109</a> |
| 2391 | 07.2449.K | SRR453037 | <a href="#">22586109</a> |
| 2392 | 07.2496.L | SRR453038 | <a href="#">22586109</a> |
| 2393 | 07.2589.M | SRR453039 | <a href="#">22586109</a> |
| 2394 | 07.2880.V | SRR453040 | <a href="#">22586109</a> |
| 2395 | 07.3841.N | SRR453041 | <a href="#">22586109</a> |
| 2397 | 07.6659.K | SRR453043 | <a href="#">22586109</a> |
| 2398 | 07.7206.Y | SRR453044 | <a href="#">22586109</a> |
| 2404 | 3366      | SRR453075 | <a href="#">1087651</a>  |
| 2407 | ANS46     | ERR064898 |                          |
| 2408 | BK2421    | ERR064899 | <a href="#">20093474</a> |
| 2409 | LHH1      | ERR064900 | <a href="#">20093474</a> |
| 2410 | R35       | ERR064901 |                          |
| 2411 | GRE18     | ERR064902 | <a href="#">20093474</a> |
| 2412 | GRE317    | ERR064903 | <a href="#">20093474</a> |
| 2413 | GRE4      | ERR064904 | <a href="#">20093474</a> |
| 2414 | TUR9      | ERR064905 | <a href="#">20093474</a> |
| 2415 | TUR1      | ERR064906 | <a href="#">20093474</a> |
| 2416 | 3HK       | ERR064907 |                          |
| 2417 | TUR27     | ERR064908 | <a href="#">20093474</a> |
| 2418 | HU109     | ERR064909 | <a href="#">20093474</a> |
| 2419 | HUR18     | ERR064910 | <a href="#">20093474</a> |
| 2420 | URU110    | ERR064911 | <a href="#">20093474</a> |
| 2421 | 2A8       | ERR064912 |                          |
| 2422 | HU25      | ERR064913 | <a href="#">20093474</a> |
| 2423 | BRA2      | ERR064914 | <a href="#">20093474</a> |
| 2424 | CHL1      | ERR064915 | <a href="#">20093474</a> |
| 2425 | CHL151    | ERR064916 | <a href="#">20093474</a> |
| 2426 | BRA36     | ERR064917 | <a href="#">20093474</a> |
| 2427 | BZ48      | ERR064918 | <a href="#">20093474</a> |
| 2428 | AGT120    | ERR064919 |                          |
| 2429 | HSJ216    | ERR064920 | <a href="#">20093474</a> |
| 2430 | HGSA9     | ERR064921 | <a href="#">20093474</a> |
| 2431 | HGSA142   | ERR064922 | <a href="#">20093474</a> |
| 2432 | AGT9      | ERR064923 |                          |
| 2433 | AGT67     | ERR064924 |                          |
| 2434 | URU34     | ERR064925 | <a href="#">20093474</a> |
| 2435 | AGT1      | ERR064926 |                          |
| 2436 | HU106     | ERR064927 | <a href="#">20093474</a> |
| 2437 | HUSA304   | ERR064928 | <a href="#">20093474</a> |
| 2439 | HDG2      | ERR064930 | <a href="#">20093474</a> |
| 2440 | HSA10     | ERR064931 | <a href="#">20093474</a> |
| 2441 | FFP103    | ERR064932 | <a href="#">20093474</a> |
| 2442 | ICP5011   | ERR064933 | <a href="#">20093474</a> |
| 2443 | ICP5014   | ERR064934 | <a href="#">20093474</a> |
| 2444 | ICP5062   | ERR064935 | <a href="#">20093474</a> |
| 2445 | GRE108    | ERR064936 | <a href="#">20093474</a> |
| 2446 | CHI59     | ERR064937 | <a href="#">20093474</a> |
| 2447 | CHI61     | ERR064938 | <a href="#">20093474</a> |

|      |           |           |                          |
|------|-----------|-----------|--------------------------|
| 2448 | S85       | ERR064939 | <a href="#">20093474</a> |
| 2449 | S130      | ERR064940 | <a href="#">20093474</a> |
| 2450 | S87       | ERR064941 | <a href="#">20093474</a> |
| 2451 | S93       | ERR064942 | <a href="#">20093474</a> |
| 2452 | S71       | ERR064943 | <a href="#">20093474</a> |
| 2453 | S40       | ERR064944 | <a href="#">20093474</a> |
| 2454 | S102      | ERR064945 | <a href="#">20093474</a> |
| 2455 | S7        | ERR064946 | <a href="#">20093474</a> |
| 2456 | S38       | ERR064947 | <a href="#">20093474</a> |
| 2457 | DEN907    | ERR064948 | <a href="#">20093474</a> |
| 2458 | S26       | ERR064949 | <a href="#">20093474</a> |
| 2459 | S97       | ERR064950 | <a href="#">20093474</a> |
| 2460 | S25       | ERR064951 | <a href="#">20093474</a> |
| 2461 | S106      | ERR064952 | <a href="#">20093474</a> |
| 2462 | S2        | ERR064953 | <a href="#">20093474</a> |
| 2463 | S78       | ERR064954 | <a href="#">20093474</a> |
| 2464 | S42       | ERR064955 | <a href="#">20093474</a> |
| 2465 | S81       | ERR064956 | <a href="#">20093474</a> |
| 2466 | S24       | ERR064957 | <a href="#">20093474</a> |
| 2467 | S21       | ERR064958 | <a href="#">20093474</a> |
| 2468 | S39       | ERR064959 | <a href="#">20093474</a> |
| 2469 | 700059    | ERR017268 | <a href="#">23299977</a> |
| 2470 | 600896    | ERR017278 | <a href="#">23299977</a> |
| 2471 | 300220    | ERR017293 | <a href="#">23299977</a> |
| 2472 | 403100    | ERR017300 | <a href="#">23299977</a> |
| 2474 | ERR022145 | ERR022145 |                          |
| 2483 | ERR024976 | ERR024976 | <a href="#">23270620</a> |
| 2490 | ERR024990 | ERR024990 | <a href="#">23270620</a> |
| 2491 | ERR026667 | ERR026667 | <a href="#">23270620</a> |
| 2492 | ERR026700 | ERR026700 | <a href="#">23270620</a> |
| 2493 | ERR029391 | ERR029391 |                          |
| 2494 | SRR022847 | SRR022847 |                          |
| 2495 | SRR022848 | SRR022848 |                          |
| 2498 | SRR022851 | SRR022851 |                          |
| 2499 | SRR022852 | SRR022852 |                          |
| 2500 | ERR029473 | ERR029473 |                          |
| 2501 | ERR030214 | ERR030214 |                          |
| 2502 | ERR030263 | ERR030263 |                          |
| 2503 | ERR031671 | ERR031671 |                          |
| 2504 | 4758-03   | ERR120394 |                          |
| 2505 | 5336-03   | ERR120408 |                          |
| 2506 | 5099      | ERR120447 |                          |
| 2507 | 6050-04   | ERR120472 |                          |
| 2509 | ERR033327 | ERR033327 |                          |
| 2510 | ERR033380 | ERR033380 |                          |
| 2513 | SRR022866 | SRR022866 |                          |
| 2515 | ERR033430 | ERR033430 |                          |
| 2516 | ERR033516 | ERR033516 |                          |
| 2520 | SRR088296 | SRR088296 | <a href="#">22102812</a> |
| 2521 | SRR088297 | SRR088297 | <a href="#">22102812</a> |

|      |            |           |                          |
|------|------------|-----------|--------------------------|
| 2522 | SRR088298  | SRR088298 | <a href="#">22102812</a> |
| 2523 | SRR088299  | SRR088299 | <a href="#">22102812</a> |
| 2524 | SRR088300  | SRR088300 | <a href="#">22102812</a> |
| 2525 | SRR088301  | SRR088301 | <a href="#">22102812</a> |
| 2526 | SRR088302  | SRR088302 | <a href="#">22102812</a> |
| 2527 | SRR304676  | SRR304676 | <a href="#">21912685</a> |
| 2530 | SRR404118  | SRR404118 |                          |
| 2531 | ERR038659  | ERR038659 |                          |
| 2534 | T232T1     | ERR023863 |                          |
| 2535 | T12N24     | ERR023883 |                          |
| 2536 | T182N1     | ERR023901 |                          |
| 2537 | T286N3     | ERR033072 |                          |
| 2538 | T126N8     | ERR033826 |                          |
| 2540 | 0801481_1  | ERR017215 | <a href="#">23299977</a> |
| 2544 | T6N21      | ERR033820 |                          |
| 2545 | 801672     | ERR017194 | <a href="#">23299977</a> |
| 2546 | 703347     | ERR017238 | <a href="#">23299977</a> |
| 2547 | 601650     | ERR017285 | <a href="#">23299977</a> |
| 2548 | 10701791   | ERR017642 |                          |
| 2549 | ERR022159  | ERR022159 |                          |
| 2550 | ERR024692  | ERR024692 | <a href="#">23270620</a> |
| 2551 | ERR025804  | ERR025804 | <a href="#">23270620</a> |
| 2552 | ERR026653  | ERR026653 | <a href="#">23270620</a> |
| 2554 | ERR026692  | ERR026692 | <a href="#">23270620</a> |
| 2555 | ERR029373  | ERR029373 |                          |
| 2556 | ERR029463  | ERR029463 |                          |
| 2557 | ERR030155  | ERR030155 |                          |
| 2558 | ERR030181  | ERR030181 |                          |
| 2559 | ERR030198  | ERR030198 |                          |
| 2560 | ERR030227  | ERR030227 |                          |
| 2561 | ERR030245  | ERR030245 |                          |
| 2562 | ERR030275  | ERR030275 |                          |
| 2563 | 5160-03    | ERR120381 |                          |
| 2564 | 5166       | ERR120425 |                          |
| 2565 | 5694-04    | ERR120438 |                          |
| 2566 | 5584-04    | ERR120459 |                          |
| 2567 | 10C_repeat | ERR101899 | <a href="#">22693998</a> |
| 2569 | 12C_repeat | ERR103394 | <a href="#">22693998</a> |
| 2570 | 14C_repeat | ERR103395 | <a href="#">22693998</a> |
| 2571 | 15C_repeat | ERR103396 | <a href="#">22693998</a> |
| 2573 | 17B_repeat | ERR103398 | <a href="#">22693998</a> |
| 2574 | 18B_repeat | ERR103399 | <a href="#">22693998</a> |
| 2575 | 19B_repeat | ERR103400 | <a href="#">22693998</a> |
| 2576 | 1B_repeat  | ERR103401 | <a href="#">22693998</a> |
| 2577 | 20B_repeat | ERR103402 | <a href="#">22693998</a> |
| 2578 | 6C_repeat  | ERR103403 | <a href="#">22693998</a> |
| 2579 | 7C_repeat  | ERR103404 | <a href="#">22693998</a> |
| 2580 | 8C_repeat  | ERR103405 | <a href="#">22693998</a> |
| 2581 | ERR033266  | ERR033266 |                          |
| 2583 | ERR033312  | ERR033312 |                          |

|      |           |           |                          |
|------|-----------|-----------|--------------------------|
| 2584 | ERR033341 | ERR033341 |                          |
| 2585 | ERR033361 | ERR033361 |                          |
| 2586 | ERR033418 | ERR033418 |                          |
| 2587 | ERR033466 | ERR033466 |                          |
| 2588 | SRR016128 | SRR016128 | <a href="#">22238576</a> |
| 2589 | SRR016131 | SRR016131 | <a href="#">22238576</a> |
| 2590 | SRR016145 | SRR016145 |                          |
| 2591 | SRR016130 | SRR016130 |                          |
| 2595 | SRR016149 | SRR016149 |                          |
| 2596 | SRR016148 | SRR016148 |                          |
| 2598 | SRR022582 | SRR022582 |                          |
| 2599 | SRR016150 | SRR016150 |                          |
| 2602 | SRR016152 | SRR016152 |                          |
| 2604 | SRR016137 | SRR016137 |                          |
| 2608 | ERR033579 | ERR033579 |                          |
| 2610 | SRR016135 | SRR016135 |                          |
| 2611 | SRR016136 | SRR016136 |                          |
| 2612 | SRR016151 | SRR016151 | <a href="#">22238576</a> |
| 2616 | SRR016156 | SRR016156 | <a href="#">22238576</a> |
| 2618 | SRR016127 | SRR016127 |                          |
| 2620 | SRR016142 | SRR016142 |                          |
| 2621 | SRR016134 | SRR016134 |                          |
| 2622 | SRR016141 | SRR016141 |                          |
| 2623 | SRR016153 | SRR016153 | <a href="#">22238576</a> |
| 2624 | SRR016139 | SRR016139 | <a href="#">22238576</a> |
| 2631 | SRR016155 | SRR016155 | <a href="#">22238576</a> |
| 2633 | SRR016122 | SRR016122 | <a href="#">22238576</a> |
| 2635 | SRR016147 | SRR016147 | <a href="#">22238576</a> |
| 2637 | ERR048379 | ERR048379 |                          |
| 2638 | ERR048394 | ERR048394 |                          |
| 2639 | ERR048429 | ERR048429 |                          |
| 2640 | ERR048475 | ERR048475 |                          |
| 2641 | ERR086163 | ERR086163 |                          |
| 2642 | ERR086186 | ERR086186 |                          |
| 2643 | ERR086210 | ERR086210 |                          |
| 2644 | ERR109223 | ERR109223 |                          |
| 2645 | SRR031227 | SRR031227 |                          |
| 2646 | SRR031228 | SRR031228 |                          |
| 2647 | SRR073227 | SRR073227 |                          |
| 2648 | SRR073304 | SRR073304 |                          |
| 2649 | SRR073305 | SRR073305 |                          |
| 2650 | ERR109247 | ERR109247 |                          |
| 2653 | SRR016390 | SRR016390 |                          |
| 2654 | ERR109262 | ERR109262 |                          |
| 2655 | ERR119023 | ERR119023 |                          |
| 2656 | ERR119056 | ERR119056 |                          |
| 2657 | ERR044260 | ERR044260 | <a href="#">22205512</a> |
| 2658 | ERR046449 | ERR046449 | <a href="#">22205512</a> |
| 2659 | ERR046495 | ERR046495 | <a href="#">22205512</a> |
| 2660 | ASARM89   | ERR084519 |                          |

|      |           |           |                          |
|------|-----------|-----------|--------------------------|
| 2661 | ASARM109  | ERR084535 |                          |
| 2662 | ASARM130  | ERR084555 |                          |
| 2663 | ASARM156  | ERR084577 |                          |
| 2664 | ERR084601 | ERR084601 |                          |
| 2665 | ERR084631 | ERR084631 |                          |
| 2666 | ASARM187  | ERR084656 |                          |
| 2667 | ASARM212  | ERR084676 |                          |
| 2668 | ASARA11   | ERR084701 |                          |
| 2669 | ERR084730 | ERR084730 |                          |
| 2670 | 83150234  | ERR086080 |                          |
| 2671 | 83430188  | ERR086106 |                          |
| 2672 | 90180032  | ERR086129 |                          |
| 2673 | 83080257  | ERR086073 |                          |
| 2674 | 83200039  | ERR086089 |                          |
| 2675 | 83270036  | ERR086097 |                          |
| 2676 | 83650201  | ERR086114 |                          |
| 2677 | 90090209  | ERR086123 |                          |
| 2678 | 90370223  | ERR086135 |                          |
| 2679 | 91960172  | ERR086142 |                          |
| 2680 | P13       | ERR070038 | <a href="#">23158674</a> |
| 2681 | P23       | ERR072247 | <a href="#">23158674</a> |
| 2682 | ERR085420 | ERR085420 | <a href="#">23158678</a> |
| 2683 | HCW18     | ERR128718 | <a href="#">23158674</a> |
| 2684 | ERR070035 | ERR070035 | <a href="#">23158674</a> |
| 2685 | ERR085416 | ERR085416 | <a href="#">23158678</a> |
| 2686 | ERR089823 | ERR089823 | <a href="#">23158678</a> |
| 2687 | P26       | ERR128707 | <a href="#">23158674</a> |
| 2688 | ERR131804 | ERR131804 | <a href="#">23158674</a> |
| 2689 | HCW7      | ERR131810 | <a href="#">23158674</a> |
| 2690 | SRR492709 | SRR492709 |                          |
| 2691 | SRR493858 | SRR493858 |                          |
| 2692 | SRR493898 | SRR493898 |                          |
| 2693 | SRR494910 | SRR494910 |                          |
| 2694 | SRR494933 | SRR494933 |                          |
| 2695 | SRR494955 | SRR494955 |                          |
| 2696 | SRR494973 | SRR494973 |                          |
| 2697 | SRR496379 | SRR496379 |                          |
| 2698 | SRR497493 | SRR497493 |                          |
| 2699 | SRR497505 | SRR497505 |                          |
| 2700 | SRR497524 | SRR497524 |                          |
| 2701 | SRR497538 | SRR497538 |                          |
| 2702 | SRR497553 | SRR497553 |                          |
| 2703 | SRR497574 | SRR497574 |                          |
| 2704 | SRR497587 | SRR497587 |                          |
| 2705 | SRR492693 | SRR492693 |                          |
| 2706 | ERR048494 | ERR048494 |                          |
| 2707 | ERR086172 | ERR086172 |                          |
| 2708 | ERR086196 | ERR086196 |                          |
| 2709 | ERR086221 | ERR086221 |                          |
| 2710 | ERR109233 | ERR109233 |                          |



|      |           |           |  |
|------|-----------|-----------|--|
| 2711 | ERR109254 | ERR109254 |  |
| 2712 | ERR119035 | ERR119035 |  |
| 2713 | ASARM100  | ERR084528 |  |
| 2714 | ASARM120  | ERR084545 |  |
| 2715 | ASARM142  | ERR084565 |  |
| 2716 | ERR084590 | ERR084590 |  |
| 2717 | ERR084614 | ERR084614 |  |
| 2718 | ASARM174  | ERR084643 |  |
| 2719 | ASARM200  | ERR084665 |  |
| 2720 | ASARA14   | ERR084713 |  |
| 2721 | ERR084747 | ERR084747 |  |
| 2722 | ERR084760 | ERR084760 |  |
| 2723 | ERR084771 | ERR084771 |  |
| 2725 | SRR016396 | SRR016396 |  |
| 2727 | SRR016394 | SRR016394 |  |
| 2728 | SRR016399 | SRR016399 |  |
| 2729 | SRR016398 | SRR016398 |  |
| 2730 | SRR016395 | SRR016395 |  |
| 2731 | SRR016782 | SRR016782 |  |
| 2733 | ERR033683 | ERR033683 |  |
| 2734 | SRR016388 | SRR016388 |  |
| 2735 | SRR016389 | SRR016389 |  |
| 2736 | SRR016781 | SRR016781 |  |
| 2737 | SRR016392 | SRR016392 |  |
| 2739 | SRR016400 | SRR016400 |  |
| 2740 | SRR016391 | SRR016391 |  |
| 2741 | SRR016783 | SRR016783 |  |
| 2742 | SRR016393 | SRR016393 |  |
| 2743 | ERR038367 | ERR038367 |  |
| 2744 | ERR038666 | ERR038666 |  |
| 2745 | ERR048371 | ERR048371 |  |
| 2746 | ERR048387 | ERR048387 |  |
| 2747 | ERR048405 | ERR048405 |  |
| 2748 | ERR048458 | ERR048458 |  |
| 2750 | ERR033302 | ERR033302 |  |
| 2751 | ERR033351 | ERR033351 |  |
| 2752 | ERR033369 | ERR033369 |  |
| 2754 | ERR033409 | ERR033409 |  |
| 2755 | ERR033437 | ERR033437 |  |
| 2756 | ERR033454 | ERR033454 |  |
| 2757 | ERR033476 | ERR033476 |  |
| 2758 | ERR033505 | ERR033505 |  |
| 2759 | ERR033524 | ERR033524 |  |
| 2761 | ERR033564 | ERR033564 |  |
| 2776 | SRR016780 | SRR016780 |  |
| 2777 | SRR016397 | SRR016397 |  |
| 2780 | SRR088896 | SRR088896 |  |
| 2781 | SRR088897 | SRR088897 |  |
| 2814 | SRR016387 | SRR016387 |  |
| 2815 | SRR400026 | SRR400026 |  |

|      |                 |           |                          |
|------|-----------------|-----------|--------------------------|
| 2816 | SRR277418       | SRR277418 |                          |
| 2817 | SRR278029       | SRR278029 |                          |
| 2871 | HO5378059211    | ERR038046 |                          |
| 2872 | HO7230040705    | ERR038047 |                          |
| 2874 | HO7258047505    | ERR038049 |                          |
| 2881 | NL0113995       | ERR038056 |                          |
| 2882 | H65             | ERR038057 |                          |
| 2883 | H182MRSA        | ERR038058 |                          |
| 2884 | C720MRSA        | ERR038059 | <a href="#">23299977</a> |
| 2885 | Btn1626         | ERR038060 | <a href="#">23299977</a> |
| 2887 | 99St18131       | ERR038062 |                          |
| 2891 | MRSA354         | ERR038066 |                          |
| 2893 | MRSA119         | ERR038068 |                          |
| 2894 | Fin75916        | ERR038069 |                          |
| 2896 | Btn2172         | ERR038071 |                          |
| 2897 | Btn2292         | ERR038072 |                          |
| 2898 | NOTTMA2         | ERR038073 |                          |
| 2901 | ARI5            | ERR038076 |                          |
| 2902 | ARI10           | ERR038077 |                          |
| 2903 | ARI11           | ERR038078 |                          |
| 2904 | ARI12           | ERR038079 |                          |
| 2908 | ARI1            | ERR038083 |                          |
| 2911 | ARI16           | ERR038086 |                          |
| 2912 | ARI17           | ERR038087 |                          |
| 2913 | ARI19           | ERR038088 |                          |
| 2914 | ARI22           | ERR038089 |                          |
| 2915 | ARI23           | ERR038090 |                          |
| 2917 | ARI36           | ERR038092 |                          |
| 2921 | W44936          | ERR038096 |                          |
| 2922 | M81008          | ERR038097 |                          |
| 2923 | T50530          | ERR038098 |                          |
| 2924 | H91491          | ERR038099 |                          |
| 2925 | M66556          | ERR038100 |                          |
| 2927 | F90202          | ERR038102 |                          |
| 2933 | RH0600013805    | ERR038108 |                          |
| 2979 | HO7174053405_2  | ERR038166 |                          |
| 2980 | H280600006205_2 | ERR038167 |                          |
| 2981 | Phenol127911_2  | ERR038168 |                          |
| 2982 | RH0600006409_2  | ERR038169 |                          |
| 2983 | HO7374046805_2  | ERR038170 |                          |
| 2984 | HO5322054809_2  | ERR038171 |                          |
| 2985 | RH0600006109_2  | ERR038172 |                          |
| 2987 | 984823X_2       | ERR038174 |                          |
| 2990 | 10000174        | ERR044560 |                          |
| 2991 | 10000175        | ERR044561 |                          |
| 2992 | 10000186        | ERR044562 |                          |
| 2993 | 10000187        | ERR044563 |                          |
| 2994 | 10000188        | ERR044564 |                          |
| 2995 | 10000189        | ERR044565 |                          |
| 2996 | 10000190        | ERR044566 |                          |

|      |          |           |  |
|------|----------|-----------|--|
| 2997 | 10000191 | ERR044567 |  |
| 2998 | 10000192 | ERR044568 |  |
| 2999 | 10000193 | ERR044569 |  |
| 3000 | 10000194 | ERR044570 |  |
| 3001 | 10000195 | ERR044571 |  |
| 3002 | 10000206 | ERR044572 |  |
| 3003 | 10000207 | ERR044573 |  |
| 3004 | 10000208 | ERR044574 |  |
| 3005 | 10000209 | ERR044575 |  |
| 3006 | 10000210 | ERR044576 |  |
| 3007 | 10000211 | ERR044577 |  |
| 3008 | 10000212 | ERR044578 |  |
| 3010 | 10000214 | ERR044580 |  |
| 3011 | 10000215 | ERR044581 |  |
| 3012 | 11000207 | ERR044582 |  |
| 3013 | 11000208 | ERR044583 |  |
| 3014 | 11000212 | ERR044584 |  |
| 3015 | 11000213 | ERR044585 |  |
| 3016 | 11000214 | ERR044586 |  |
| 3017 | 11000215 | ERR044587 |  |
| 3018 | 11000216 | ERR044588 |  |
| 3019 | 11000217 | ERR044589 |  |
| 3020 | 11000218 | ERR044590 |  |
| 3021 | 11000219 | ERR044591 |  |
| 3022 | 11000225 | ERR044592 |  |
| 3023 | 11000226 | ERR044593 |  |
| 3024 | 11000227 | ERR044594 |  |
| 3025 | 11000228 | ERR044595 |  |
| 3026 | 53220548 | ERR044596 |  |
| 3027 | 53780592 | ERR044597 |  |
| 3028 | 72300407 | ERR044598 |  |
| 3029 | 72580470 | ERR044599 |  |
| 3030 | 72580475 | ERR044600 |  |
| 3031 | 72860467 | ERR044601 |  |
| 3032 | 73740468 | ERR044602 |  |
| 3033 | 6000061  | ERR045052 |  |
| 3034 | 6000064  | ERR045053 |  |
| 3035 | 8000258  | ERR045054 |  |
| 3036 | 8000268  | ERR045055 |  |
| 3037 | 10000141 | ERR045056 |  |
| 3038 | 10000146 | ERR045057 |  |
| 3039 | 10000147 | ERR045058 |  |
| 3040 | 10000148 | ERR045059 |  |
| 3041 | 10000149 | ERR045060 |  |
| 3042 | 10000150 | ERR045061 |  |
| 3043 | 10000151 | ERR045062 |  |
| 3044 | 10000152 | ERR045063 |  |
| 3045 | 10000153 | ERR045064 |  |
| 3046 | 10000155 | ERR045065 |  |
| 3047 | 10000166 | ERR045066 |  |

|      |          |            |                          |
|------|----------|------------|--------------------------|
| 3048 | 10000167 | ERR045067  |                          |
| 3049 | 10000168 | ERR045068  |                          |
| 3050 | 10000169 | ERR045069  |                          |
| 3051 | 10000170 | ERR045070  |                          |
| 3052 | 10000171 | ERR045071  |                          |
| 3053 | 10000172 | ERR045072  |                          |
| 3054 | 10000173 | ERR045073  |                          |
| 3102 | VC40     | PRJNA66591 | <a href="#">22461548</a> |
