# Supplementary material
Source: PubMed Central journal article supplement (PMC3980634)
Supplement: NIHMS57777-supplement-Table_4C.pdf [file NIHMS57777-supplement-Table_4C.pdf]

| <b>Figure 4C</b>                                                                              |                            |                             |                          |
|-----------------------------------------------------------------------------------------------|----------------------------|-----------------------------|--------------------------|
| <b>Database:</b> <a href="http://pubmlst.org/rmlst/">http://pubmlst.org/rmlst/</a>            |                            |                             |                          |
| <b>Project name:</b> Maiden 2013 Nat Rev SCBU                                                 |                            |                             |                          |
| <b>Project id:</b> 30                                                                         |                            |                             |                          |
| <b>Description:</b> <i>S. aureus</i> isolates from an outbreak in a UK Special Care Baby Unit |                            |                             |                          |
| <b>BIGSdb ID</b>                                                                              | <b>BIGSdb isolate name</b> | <b>ENA accession number</b> | <b>References</b>        |
| 2245                                                                                          | P4                         | ERR070044                   | <a href="#">23158674</a> |
| 2680                                                                                          | P13                        | ERR070038                   | <a href="#">23158674</a> |
| 2681                                                                                          | P23                        | ERR072247                   | <a href="#">23158674</a> |
| 2683                                                                                          | HCW18                      | ERR128718                   | <a href="#">23158674</a> |
| 2687                                                                                          | P26                        | ERR128707                   | <a href="#">23158674</a> |
| 2689                                                                                          | HCW7                       | ERR131810                   | <a href="#">23158674</a> |
| 3909                                                                                          | P9                         | ERR070034                   | <a href="#">23158674</a> |
| 3910                                                                                          | P10                        | ERR070036                   | <a href="#">23158674</a> |
| 3912                                                                                          | P11                        | ERR070039                   | <a href="#">23158674</a> |
| 3913                                                                                          | P12                        | ERR070040                   | <a href="#">23158674</a> |
| 3914                                                                                          | P2                         | ERR070042                   | <a href="#">23158674</a> |
| 3915                                                                                          | P3                         | ERR070043                   | <a href="#">23158674</a> |
| 3917                                                                                          | P1                         | ERR070045                   | <a href="#">23158674</a> |
| 3918                                                                                          | P5                         | ERR070046                   | <a href="#">23158674</a> |
| 3919                                                                                          | P6                         | ERR070047                   | <a href="#">23158674</a> |
| 3920                                                                                          | P7                         | ERR070048                   | <a href="#">23158674</a> |
| 3921                                                                                          | P14                        | ERR072246                   | <a href="#">23158674</a> |
| 3923                                                                                          | P15                        | ERR108054                   | <a href="#">23158674</a> |
| 3924                                                                                          | P16                        | ERR124429                   | <a href="#">23158674</a> |
| 3925                                                                                          | P17                        | ERR124430                   | <a href="#">23158674</a> |
| 3926                                                                                          | P20                        | ERR124431                   | <a href="#">23158674</a> |
| 3927                                                                                          | P19                        | ERR124432                   | <a href="#">23158674</a> |
| 3928                                                                                          | P21                        | ERR124433                   | <a href="#">23158674</a> |
| 3929                                                                                          | P22                        | ERR124434                   | <a href="#">23158674</a> |
| 3930                                                                                          | P24                        | ERR124435                   | <a href="#">23158674</a> |
| 3932                                                                                          | P25                        | ERR128708                   | <a href="#">23158674</a> |
| 3933                                                                                          | HCW1                       | ERR128709                   | <a href="#">23158674</a> |
| 3934                                                                                          | HCW2                       | ERR128710                   | <a href="#">23158674</a> |
| 3935                                                                                          | HCW3                       | ERR128711                   | <a href="#">23158674</a> |
| 3936                                                                                          | HCW4                       | ERR128712                   | <a href="#">23158674</a> |
| 3937                                                                                          | HCW13                      | ERR128713                   | <a href="#">23158674</a> |
| 3938                                                                                          | HCW14                      | ERR128714                   | <a href="#">23158674</a> |
| 3939                                                                                          | HCW15                      | ERR128715                   | <a href="#">23158674</a> |
| 3940                                                                                          | HCW16                      | ERR128716                   | <a href="#">23158674</a> |
| 3941                                                                                          | HCW17                      | ERR128717                   | <a href="#">23158674</a> |
| 3943                                                                                          | HCW5                       | ERR131808                   | <a href="#">23158674</a> |
| 3944                                                                                          | HCW6                       | ERR131809                   | <a href="#">23158674</a> |
| 3946                                                                                          | HCW8                       | ERR131811                   | <a href="#">23158674</a> |
| 3947                                                                                          | HCW9                       | ERR131812                   | <a href="#">23158674</a> |
| 3948                                                                                          | HCW10                      | ERR131813                   | <a href="#">23158674</a> |
| 3949                                                                                          | HCW11                      | ERR131814                   | <a href="#">23158674</a> |
| 3950                                                                                          | HCW12                      | ERR131815                   | <a href="#">23158674</a> |
| 4094                                                                                          | P8                         | ERR070033                   | <a href="#">23158674</a> |

|      |       |           |                          |
|------|-------|-----------|--------------------------|
| 4095 | HCW19 | ERR128719 | <a href="#">23158674</a> |
| 4096 | HCW20 | ERR128720 | <a href="#">23158674</a> |
